# Supplementary material for: Three pathways to selective catalytic reduction of NO over Pt/Nb-AlMCM-41 under H2 with excess O2
Source: Royal Society of Chemistry journal article supplement (doi:10.1039/c6cy01166g), 2016-01-01
Supplement: c6cy01166g1.pdf [file c6cy01166g1.pdf]

**Supplementary Information for**

**“Three pathways to selective catalytic reduction of NO over Pt/Nb- $\text{AlMCM-41}$  under  $\text{H}_2$  with excess  $\text{O}_2$ ”**

*Masaru Komatsubara,<sup>a</sup> Akiko Koga,<sup>a</sup> Masashi Tanaka,<sup>b</sup> Rina Hagiwara<sup>a</sup> and Masakazu Iwamoto<sup>\*b</sup>*

<sup>a</sup> Chemical Resources Laboratory, Tokyo Institute of Technology, 4259-R1-5 Nagatsuta, Midori-ku, Yokohama 226-8503, Japan

<sup>b</sup> Research and Development Initiative, Chuo University, 1-13-27 Kasuga, Bunkyo-ku, Tokyo 112-8551, Japan

\* Corresponding author at: Research and Development Initiative, Chuo University, 1-13-27 Kasuga, Bunkyo-ku, Tokyo 112-8551, Japan

*E-mail address:* iwamotom@tamacc.chuo-u.ac.jp (M. Iwamoto).

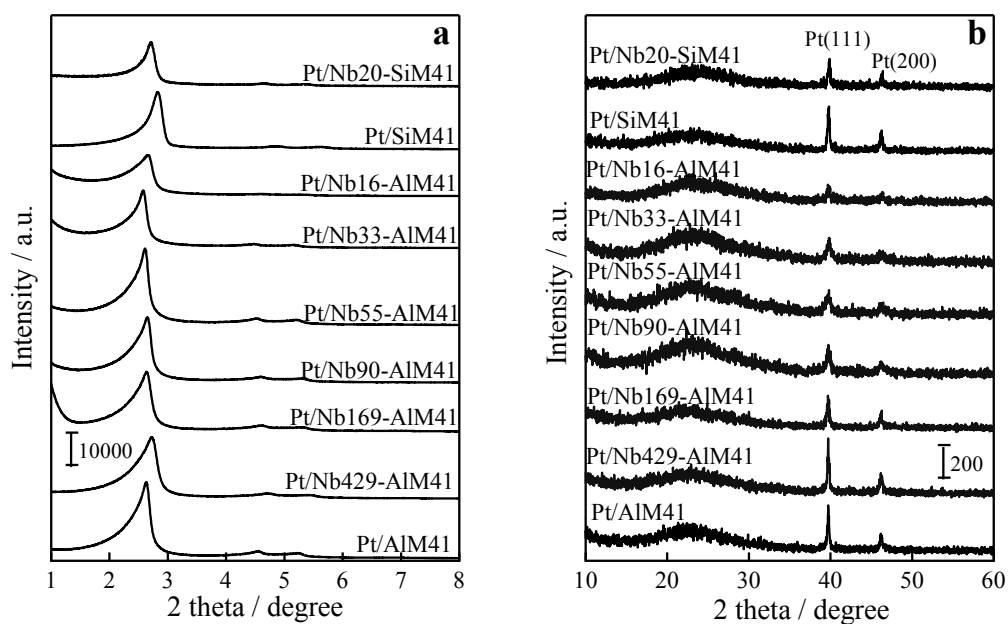

**Fig. S1.** XRD patterns of Pt/M41 and Pt/Nb-M41 of various Si/Nb ratios. The lower and higher angles are shown separately in (a) and (b).

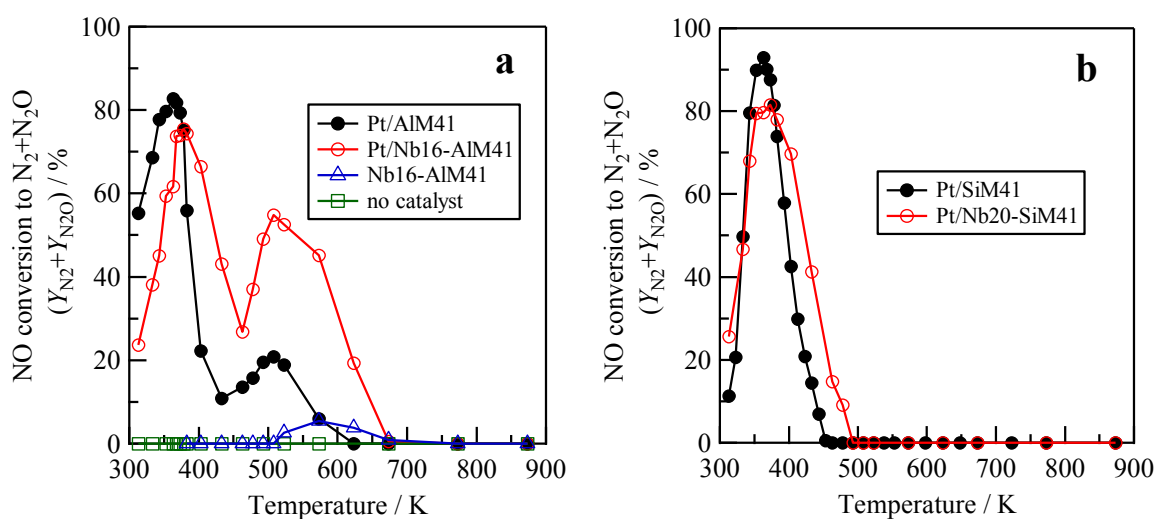

**Fig. S2** Effect of Nb on the catalytic activity of (a) Pt/AiM41 and (b) Pt/SiM41 for H<sub>2</sub>-SCR reaction. Feed gas was a mixture of 0.1% NO, 0.8% H<sub>2</sub>, and 14% O<sub>2</sub> in He; total flow rate was 100 mL min<sup>-1</sup> (GHSV 20,000 h<sup>-1</sup>).

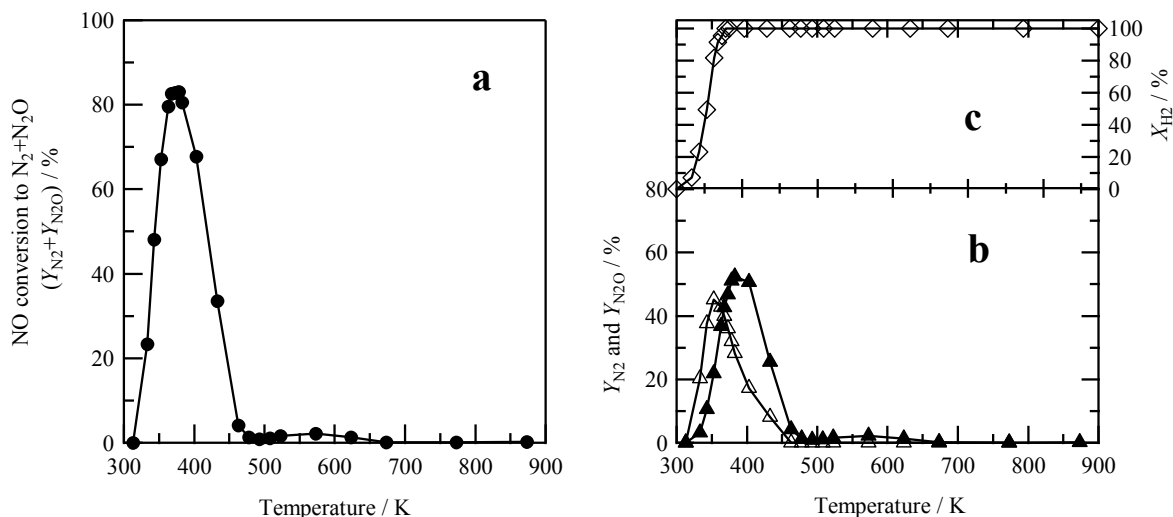

**Fig. S3.** Catalytic activity of Pt/3Nb/AlM41 prepared by impregnation for H<sub>2</sub>-SCR: (a) NO conversion, (b) N<sub>2</sub> and N<sub>2</sub>O yields, and (c) H<sub>2</sub> conversion. The amount of niobium loaded was 3 wt%. Symbols: closed circle, Y<sub>N<sub>2</sub>+Y<sub>N<sub>2</sub>O</sub>; closed triangle, Y<sub>N<sub>2</sub></sub>; open triangle, Y<sub>N<sub>2</sub>O</sub>; open rhombus, X<sub>H<sub>2</sub></sub>. Reaction conditions are the same as in Fig. S2.</sub>

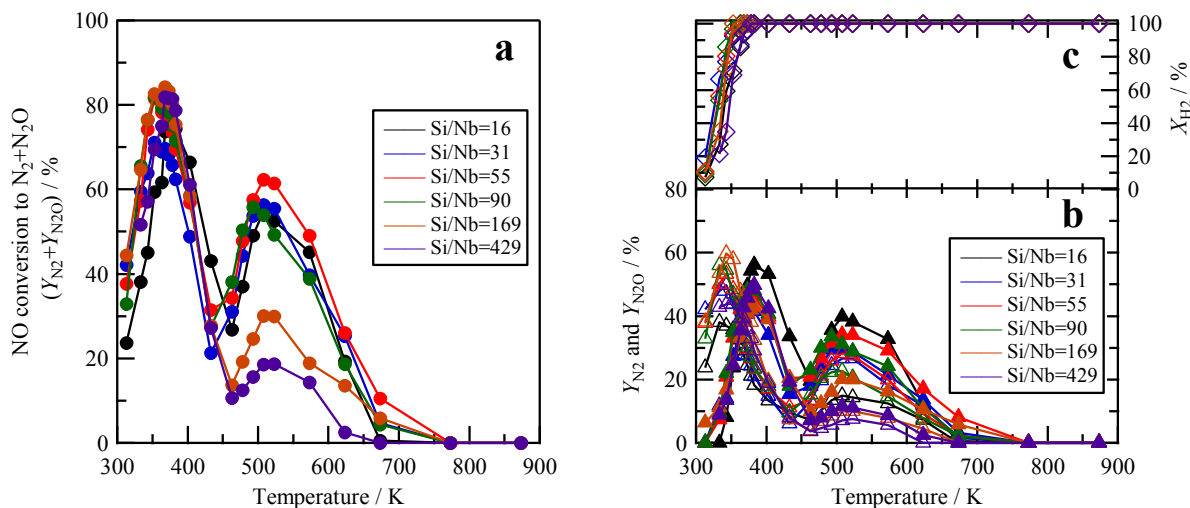

**Fig. S4.** Catalytic activity of Pt/Nb-AlM41s with Si/Nb ratios of 16-429 for H<sub>2</sub>-SCR: (a) NO conversion, (b) N<sub>2</sub> and N<sub>2</sub>O yields, and (c) H<sub>2</sub> conversion. Symbols: closed circle, Y<sub>N<sub>2</sub>+Y<sub>N<sub>2</sub>O</sub>; closed triangle, Y<sub>N<sub>2</sub></sub>; open triangle, Y<sub>N<sub>2</sub>O</sub>; open rhombus, X<sub>H<sub>2</sub></sub>. Reaction conditions are the same as in Fig. S2.</sub>

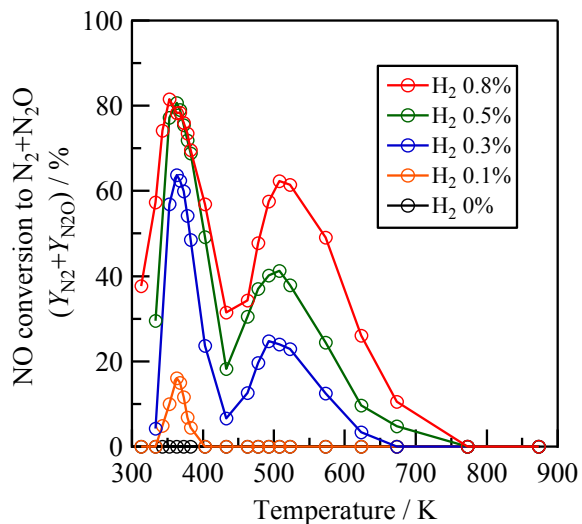

**Fig. S5** Effect of partial pressure of H<sub>2</sub> on H<sub>2</sub>-SCR over Pt/Nb55-AlM41. The reaction conditions are the same as in Fig. 1 except for partial pressure of H<sub>2</sub> (0-0.8%).

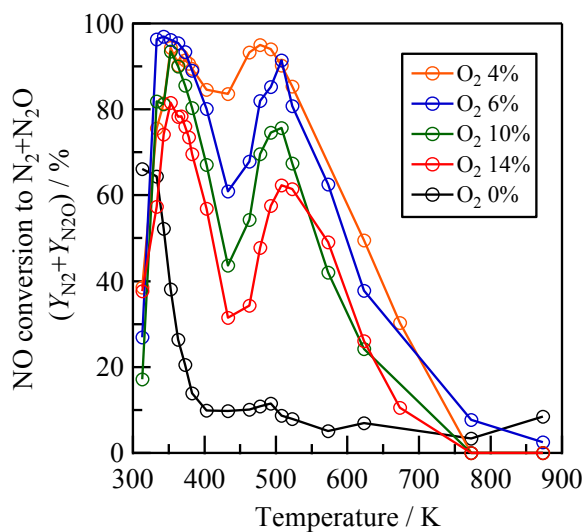

**Fig. S6** Effect of partial pressure of O<sub>2</sub> on H<sub>2</sub>-SCR over Pt/Nb55-AlM41. The reaction conditions are the same as in Fig. 1 except for partial pressure of O<sub>2</sub> (0-14%).

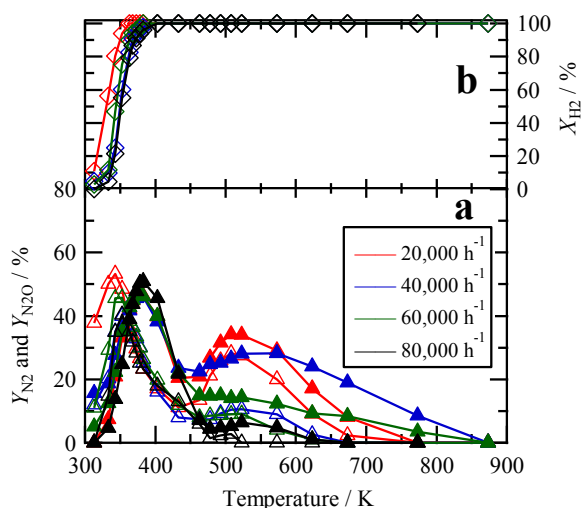

**Fig. S7.** Effect of GHSV on H<sub>2</sub>-SCR over Pt/Nb55-ALM41: (a) N<sub>2</sub> and N<sub>2</sub>O yields and (b) H<sub>2</sub> conversion. Symbols: closed triangle, Y<sub>N<sub>2</sub></sub>; open triangle, Y<sub>N<sub>2</sub>O</sub>; open rhombus, X<sub>H<sub>2</sub></sub>. The reaction conditions are the same as in Fig. 1 except for GHSV (20,000-80,000 h<sup>-1</sup>).

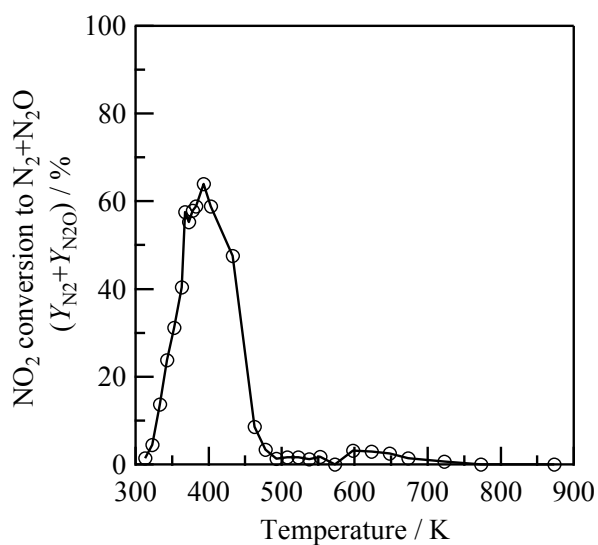

**Fig. S8** NO<sub>2</sub>-H<sub>2</sub>-O<sub>2</sub> reaction over Pt/Nb55-ALM41. Feed gas was a mixture of 0.1% NO<sub>2</sub>, 0.8% H<sub>2</sub>, and 14% O<sub>2</sub> in He; total flow rate was 100 mL min<sup>-1</sup> (GHSV 20,000 h<sup>-1</sup>).

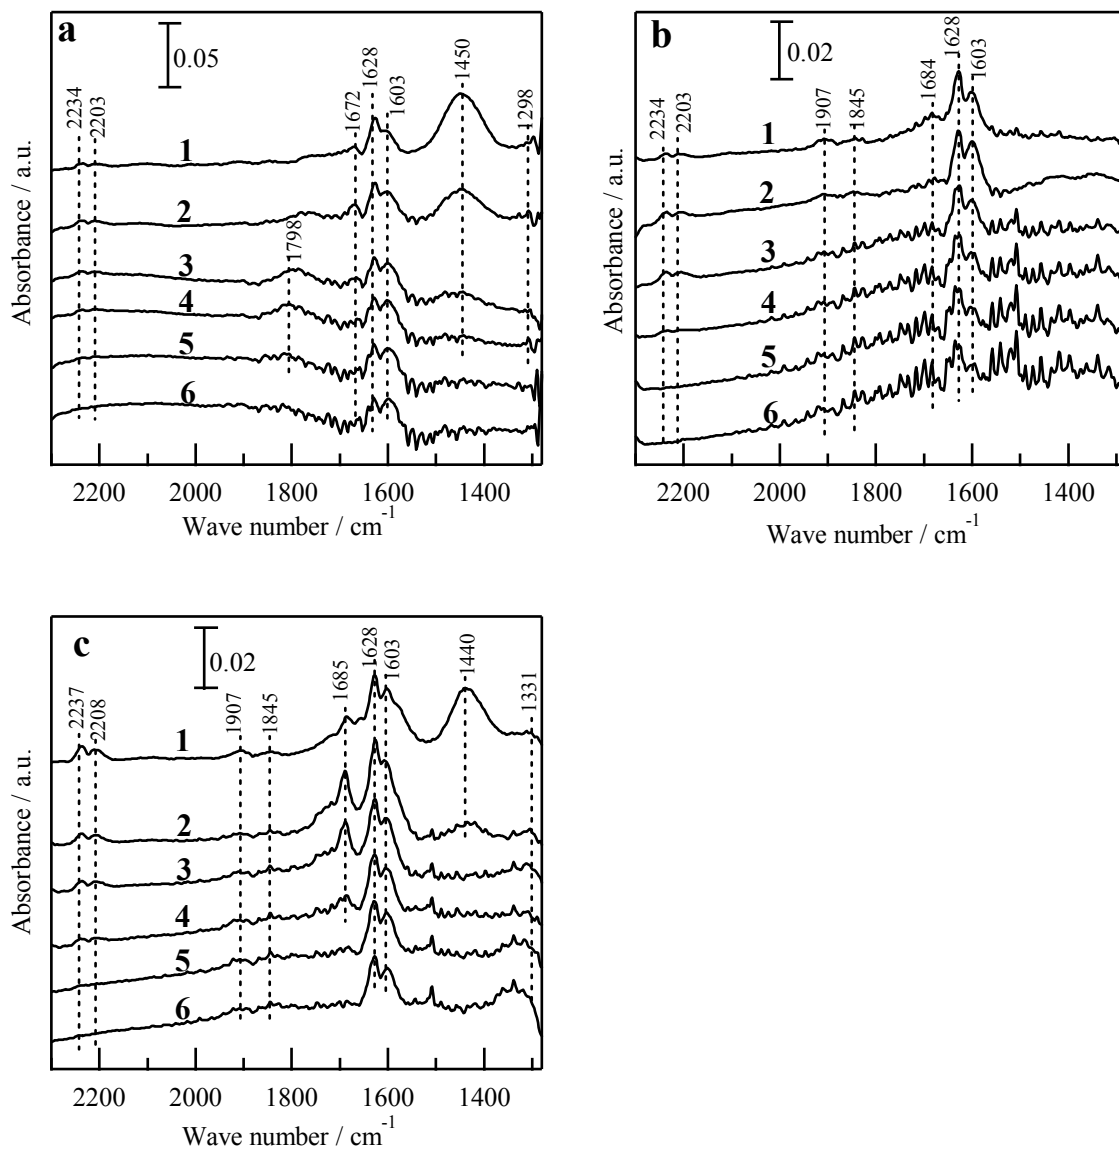

**Fig. S9.** In situ FT-IR spectra of adsorbed species on (a) Pt/AlM41, (b) Pt/SiM41, and (c) Pt/Nb20-SiM41 in the flow of reactant gases at (1) 373, (2) 403, (3) 433, (4) 463, (5) 493, and (6) 523 K. Feed gas was a mixture of 0.1% NO, 0.8% H<sub>2</sub>, and 14% O<sub>2</sub> in He; total flow rate was 100 mL min<sup>-1</sup>.
